# Supplementary material for: Effects of environmental and management factors on worldwide maize and soybean yields over the 20&lt;sup&gt;th&lt;/sup&gt; and 21&lt;sup&gt;st&lt;/sup&gt; centuries
Source: Copernicus journal article supplement (doi:10.5194/bg-2020-68), 2020-04-01
Supplement: Supplementary file [file bg-2020-68-SC1-supplement.pdf]

**Corrected Equation, Table, and Figures appearing in the Supplementary Section**

**Updated equation (SE8a) appearing in Text S5**

$$\sigma_y = \sqrt{\frac{1}{12-1} \times \sum_{m=1}^{12} (\overline{Z_{m,y}} - \mu_y)^2} \tag{SE8a}$$

**Commented [JA1]:** This has to be squared

**Updated Table S4**

Table S4. ISAM estimated change (%) in maize and soybean yields due to elevated [CO<sub>2</sub>] concentration are compared with FACE site data and CLM and AgMIP model results under wet/irrigated conditions<sup>1</sup>.

| Crop    | FACE                     | Model                                                |                  |                    |
|---------|--------------------------|------------------------------------------------------|------------------|--------------------|
|         |                          | ISAM <sup>4</sup>                                    | CLM <sup>7</sup> | AgMIP <sup>7</sup> |
| Maize   | -1.0 <sup>2</sup>        | -0.03                                                | 0.9              | 0.2 - 7.7          |
| Soybean | 14.4 ± 12.5 <sup>3</sup> | 17.5 ± 2.7 <sup>5</sup><br>(32.1 ± 4.3) <sup>6</sup> | 22               | 5.2 - 44.4         |

**Commented [JA2]:** This is the correct value

<sup>1</sup> The positive values are net sink of C by the terrestrial ecosystem  
<sup>2</sup> German- FACE site  
<sup>3</sup> SoyFACE site  
<sup>4</sup> See supplementary Text S7 for ISAM simulations  
<sup>5</sup> Calculated by the revised version of ISAM  
<sup>6</sup> Calculated by the original version of ISAM  
<sup>7</sup> Deryng et al. (2016) (See Text S11 for CLM and AgMIP models simulations)

**Updated Figure S11b and S11c with the correct results for Nitrogen and Irrigation effects on Maize and Soybean Yields**

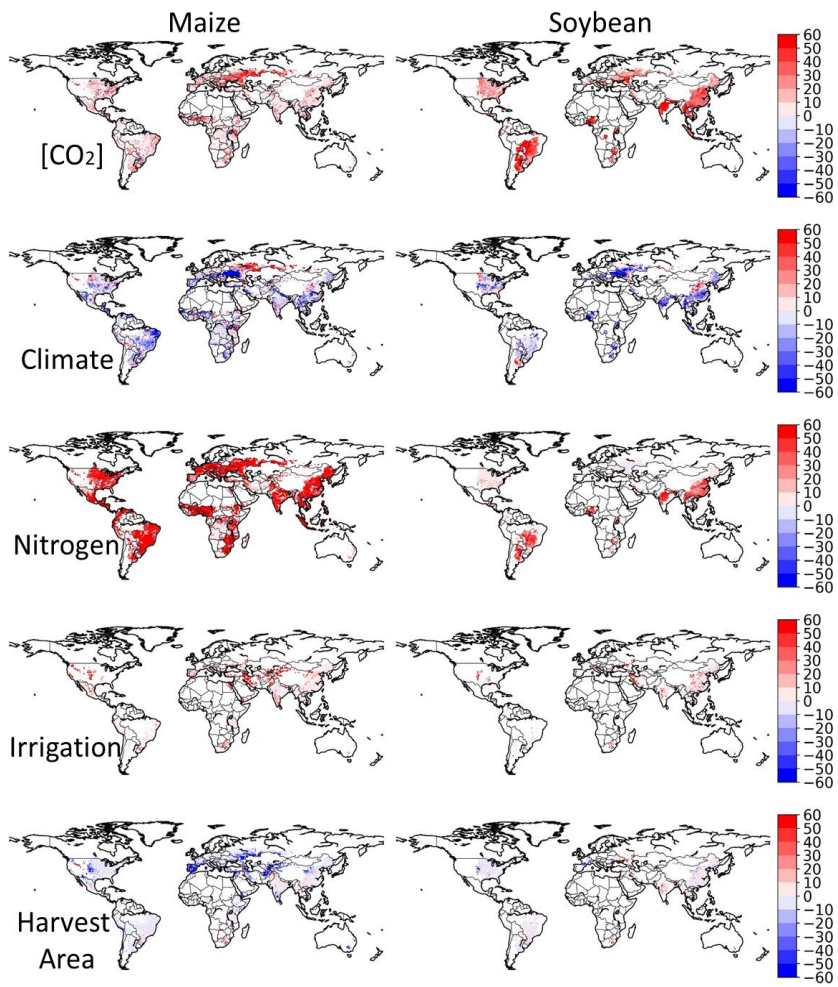

Figure S11b. Same as Figure S12a, but the changes (%) from 1996-2005 and to 2090s under RCP4.5.

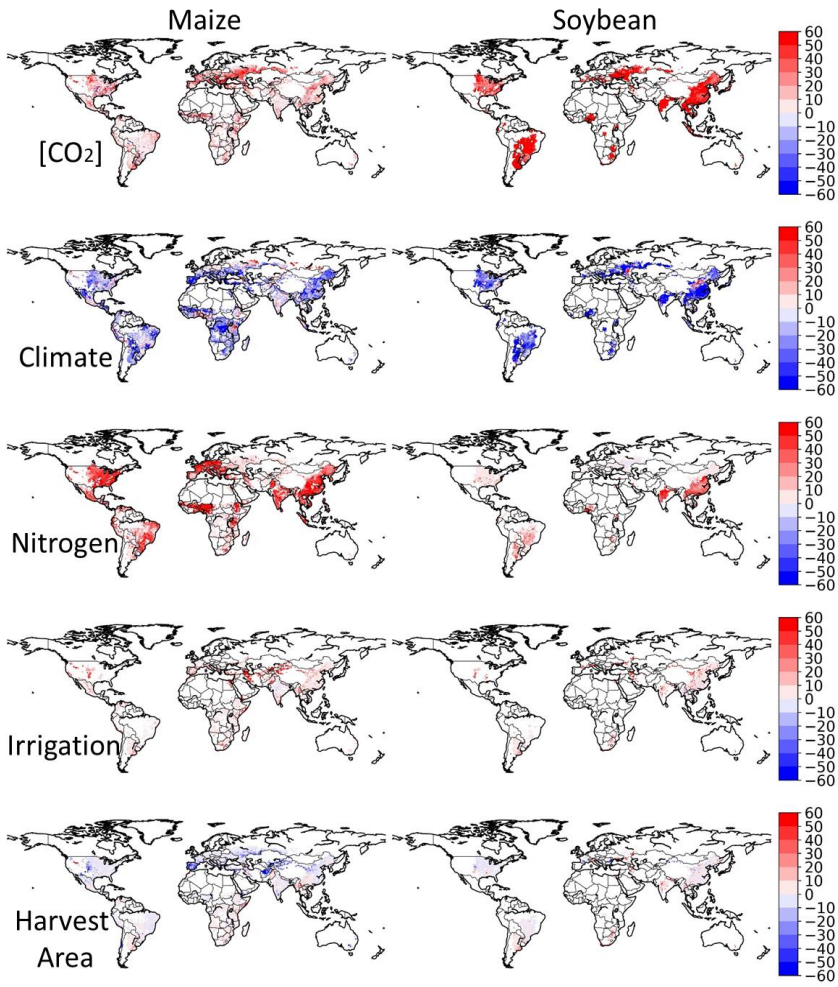

Figure S11c. Same as Figure S11a, but the changes (%) from 1996-2005 and to 2090s under RCP8.5.
